# Supplementary material
Source: HighWire-hosted journal article supplement (https://fg.bmj.com/highwire/filestream/144223/field_highwire_adjunct_files/0/flgastro-2022-102104supp001_data_supplement.pdf)
Supplement: flgastro-2022-102104supp001_data_supplement.pdf [file flgastro-2022-102104supp001_data_supplement.pdf]

## Online Supplementary Material

Supplementary table 1. Selected comorbidities at baseline

| Comorbidities at baseline, n (%)             | All patients<br>[n=63] |
|----------------------------------------------|------------------------|
| Fatigue                                      | 22 (34.9)              |
| Diabetes mellitus                            | 21 (33.3)              |
| Skin disease                                 | 21 (33.3)              |
| Anxiety/depression                           | 20 (31.7)              |
| Cardiac abnormalities/cardiovascular disease | 20 (31.7)              |
| Chronic renal disease or insufficiency       | 19 (30.2)              |
| Chronic pulmonary disease                    | 19 (30.2)              |
| Polyneuropathy/neuropathy                    | 19 (30.2)              |
| Sleep disorders                              | 19 (30.2)              |
| Any malignancies                             | 18 (28.6)              |
| Cognitive dysfunction                        | 18 (28.6)              |
| Low body weight (BMI <20 kg/m <sup>2</sup> ) | 18 (28.6)              |
| Postural hypotension                         | 18 (28.6)              |

BMI, body mass index.

Supplementary table 2. Disease activity at baseline and Year 2

| Characteristics, n (%)                     | Baseline<br>(n=63) | Year 2<br>(n=37) |
|--------------------------------------------|--------------------|------------------|
| Physician assessment of UC severity, n (%) |                    |                  |
| In remission                               | 16 (25.4)          | 18 (48.6)        |
| Mild                                       | 18 (28.6)          | 14 (37.8)        |
| Moderate                                   | 18 (28.6)          | 5 (13.5)         |
| Severe                                     | 11 (17.5)          | 0 (0.0)          |
| Missing                                    | 0                  | 26               |
| Patient assessment of UC severity, n (%)   |                    |                  |
| In remission                               | 12 (19.4)          | 12 (32.4)        |
| Mild                                       | 26 (41.9)          | 13 (35.1)        |
| Moderate                                   | 14 (22.6)          | 11 (29.7)        |
| Severe                                     | 10 (16.1)          | 1 (2.7)          |
| Missing                                    | 1                  | 26               |

**Supplementary table 3. Relationship between physician-assessed and self-assessed disease severity at baseline and Year 2**

|                                       |              | Physician-assessed disease severity |               |                   |                 | Total<br>n (%) |
|---------------------------------------|--------------|-------------------------------------|---------------|-------------------|-----------------|----------------|
|                                       |              | Remission<br>n (%)                  | Mild<br>n (%) | Moderate<br>n (%) | Severe<br>n (%) |                |
| <b>Baseline</b>                       |              |                                     |               |                   |                 |                |
| <b>Self-assessed disease severity</b> | Remission    | 8 (53.3)                            | 2 (11.1)      | 2 (11.1)          | 0               | 12 (100)       |
|                                       | Mild         | 6 (40.0)                            | 12 (66.7)     | 7 (38.9)          | 1 (9.1)         | 26 (100)       |
|                                       | Moderate     | 1 (6.7)                             | 3 (16.7)      | 5 (27.8)          | 5 (45.5)        | 14 (100)       |
|                                       | Severe       | 0                                   | 1 (5.6)       | 4 (22.2)          | 5 (45.5)        | 10 (100)       |
|                                       | Missing      | 1                                   | 0             | 0                 | 0               | 1              |
|                                       | <b>Total</b> | 15 (100)                            | 18 (100)      | 18 (100)          | 11 (100)        |                |
| <b>Year 2</b>                         |              |                                     |               |                   |                 |                |
| <b>Self-assessed disease severity</b> | Remission    | 4 (50.0)                            | 3 (23.1)      | 5 (45.5)          | 0               | 12 (100)       |
|                                       | Mild         | 2 (25.0)                            | 5 (38.5)      | 3 (27.3)          | 3 (60.0)        | 13 (100)       |
|                                       | Moderate     | 2 (25.0)                            | 5 (38.5)      | 3 (27.3)          | 1 (20.0)        | 11 (100)       |
|                                       | Severe       | 0                                   | 0             | 0                 | 1 (20.0)        | 1 (100)        |
|                                       | Missing      | 8                                   | 5             | 7                 | 6               | 26             |
|                                       | <b>Total</b> | 8 (100)                             | 13 (100)      | 11 (100)          | 5 (100)         |                |

Shaded cells indicate concordant physician and patient classification.
